# Supplementary material for: Increased IL‐10‐producing regulatory T cells are characteristic of severe cases of COVID‐19
Source: PubMed Central journal article supplement (PMC7662088; doi:10.1002/cti2.1204), 2020-11-13

**Supplementary table 1. Demographic, clinical and immunological data of healthy controls and COVID-19 patients.** BMI, body mass index; CRP, C-reactive protein; HIV, Human Immunodeficiency Virus; M, male/F, female; n/a, not applicable or not available; WHO, World Health Organization. Laboratory parameters were obtained within 24 h of blood sampling for immune phenotyping.







**Supplementary figure 1. Classification of lymphocytes.** PBMCs were isolated from healthy controls (n=6), mild-moderate COVID-19 patients (n=23) and severe COVID-19 patients (n=20), stimulated and assessed through flow cytometry. **(a)** FlowSOM clusters (identified in Figure 1) were obtained based on CD3, CD4, CD8, FOXP3, CD19, CD14. Expression of each marker on each FlowSOM cluster is shown in histogram format and **(b)** imposed on a tSNE representation.

# Supplementary figure 1

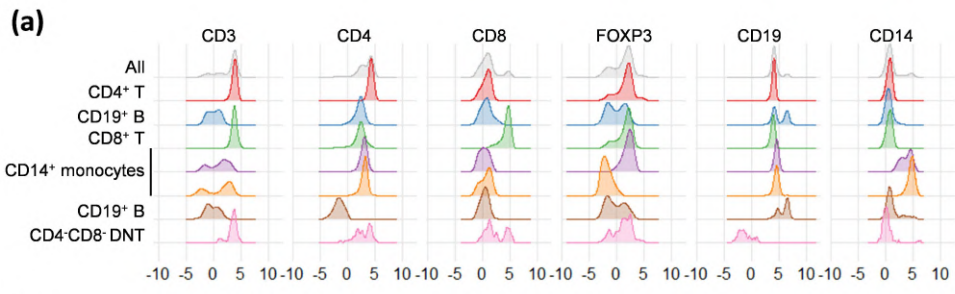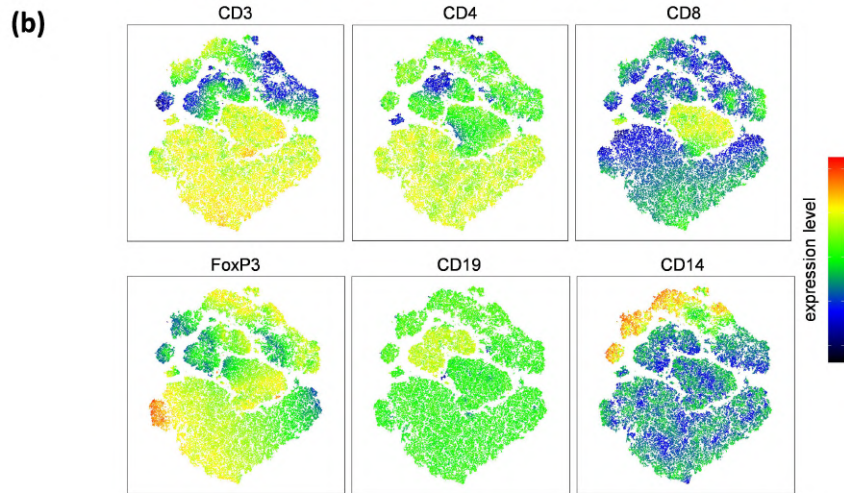

**Supplementary figure 2. Classification of conventional CD4 T cells.** PBMCs were isolated from healthy controls (n=6), mild-moderate COVID-19 patients (n=23) and severe COVID-19 patients (n=20), stimulated and assessed through flow cytometry. CD3<sup>+</sup>CD14<sup>-</sup>CD4<sup>+</sup>CD8<sup>-</sup>FOXP3<sup>-</sup> conventional T cells were manually gated in FlowJo. **(a)** FlowSOM clusters (identified in Figure 2) were obtained based on CD45RA, CCR7, 4-1BB, CD25, CTLA-4, HLA-DR, IFN $\gamma$ , IL-2, IL-4, IL-6, IL-10, IL-17a, PD-1, ROR $\gamma$ t, T-BET, TNF $\alpha$ . Expression of each marker on each FlowSOM cluster is shown in histogram format and **(b)** imposed on a tSNE representation.

## Supplementary figure 2

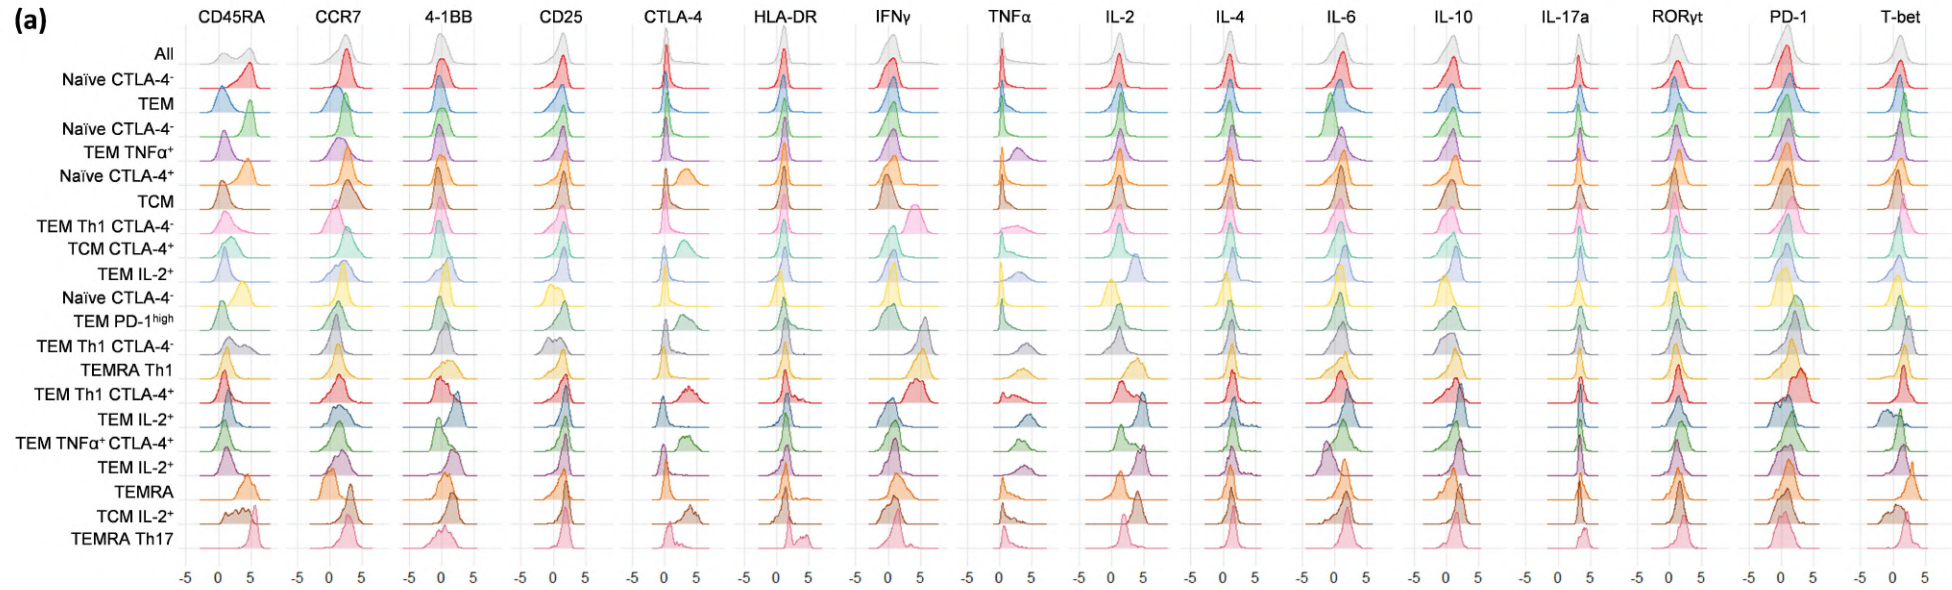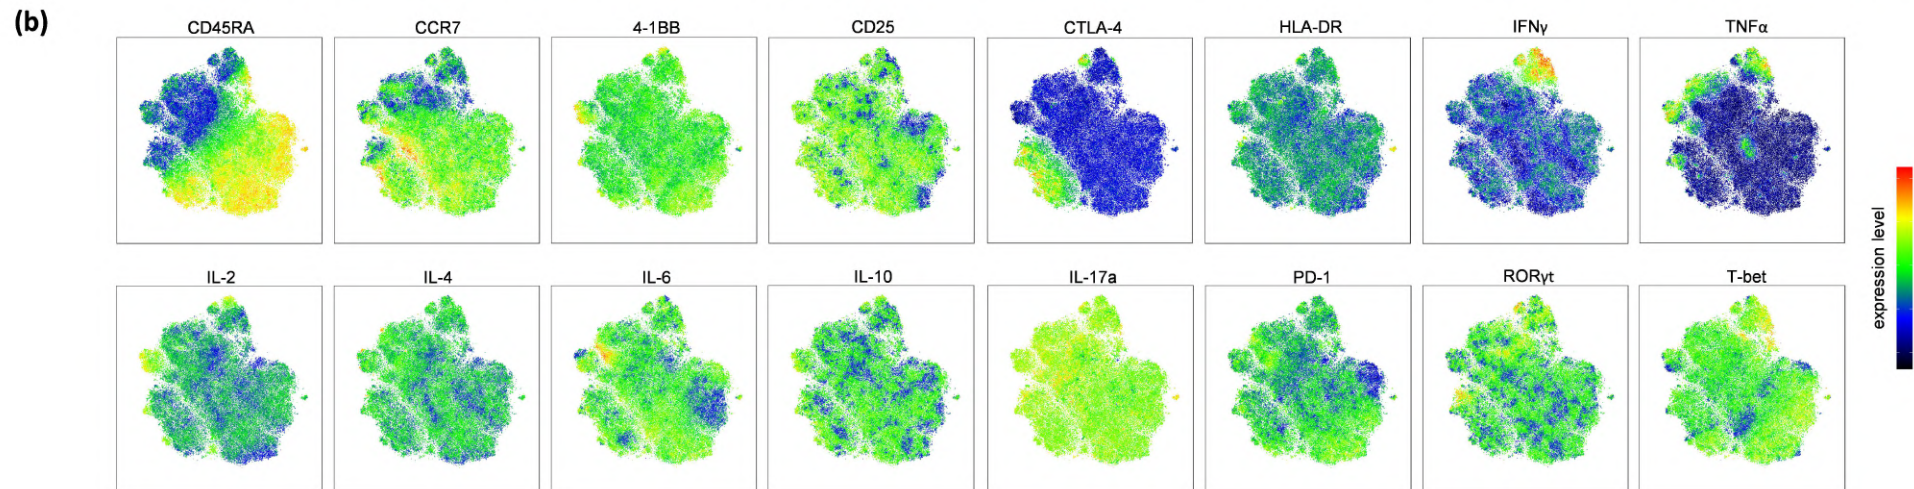



**Supplementary figure 3. Classification of regulatory T cells.** PBMCs were isolated from healthy controls (n=6), mild-moderate COVID-19 patients (n=23) and severe COVID-19 patients (n=20), stimulated and assessed through flow cytometry. CD3<sup>+</sup>CD14<sup>-</sup>CD4<sup>+</sup>CD8<sup>-</sup>FOXP3<sup>+</sup> regulatory T cells were manually gated in FlowJo. **(a)** FlowSOM clusters (identified in Figure 3) were obtained based on CD45RA, CCR7, 4-1BB, CD25, CTLA-4, HLA-DR, IFN $\gamma$ , IL-2, IL-4, IL-6, IL-10, IL-17a, PD-1, ROR $\gamma$ t, T-BET, TNF $\alpha$ . Expression of each marker on each FlowSOM cluster is shown in histogram format and **(b)** imposed on a tSNE representation. **(c)** Manual gating strategy for IL-10<sup>+</sup> regulatory T cells after gating on living single cells. **(d)** Correlation between expression of CD25 and FOXP3, as assessed by the geometric mean fluorescence intensity (gMFI), in total and IL-10<sup>+</sup> regulatory T cells of severe COVID-19 patients. The Spearman's rank correlation coefficient  $r$  as well as the significance of the correlation were calculated.

### Supplementary figure 3

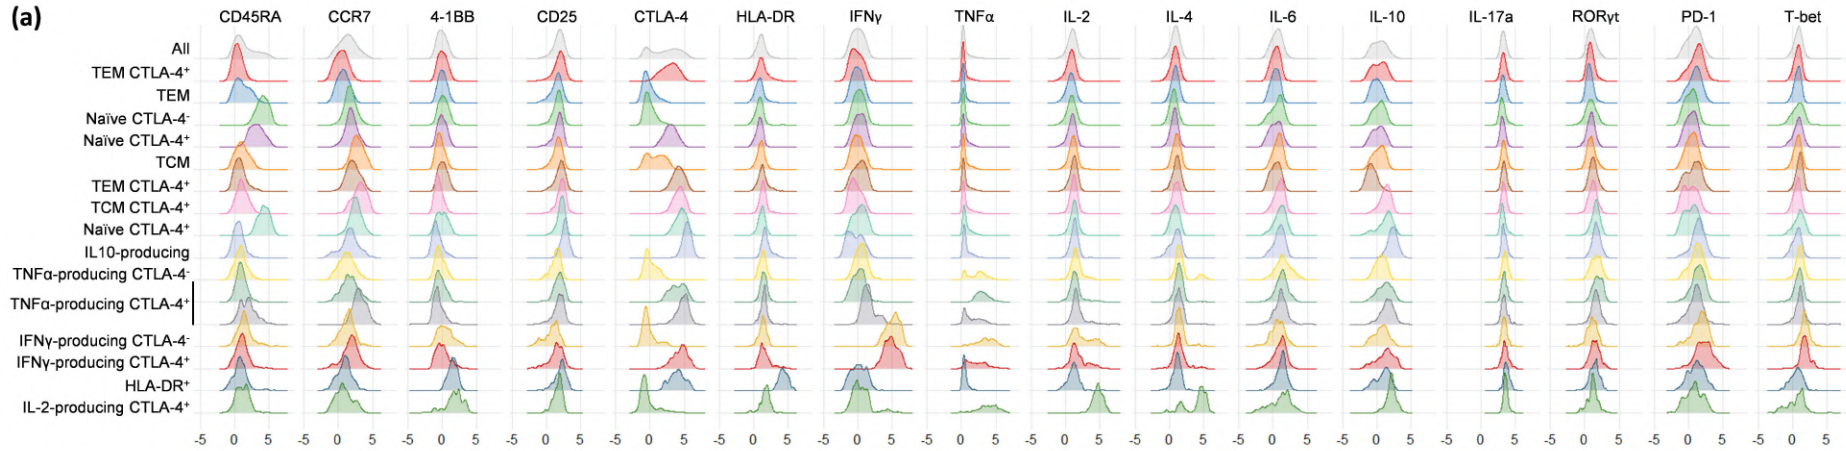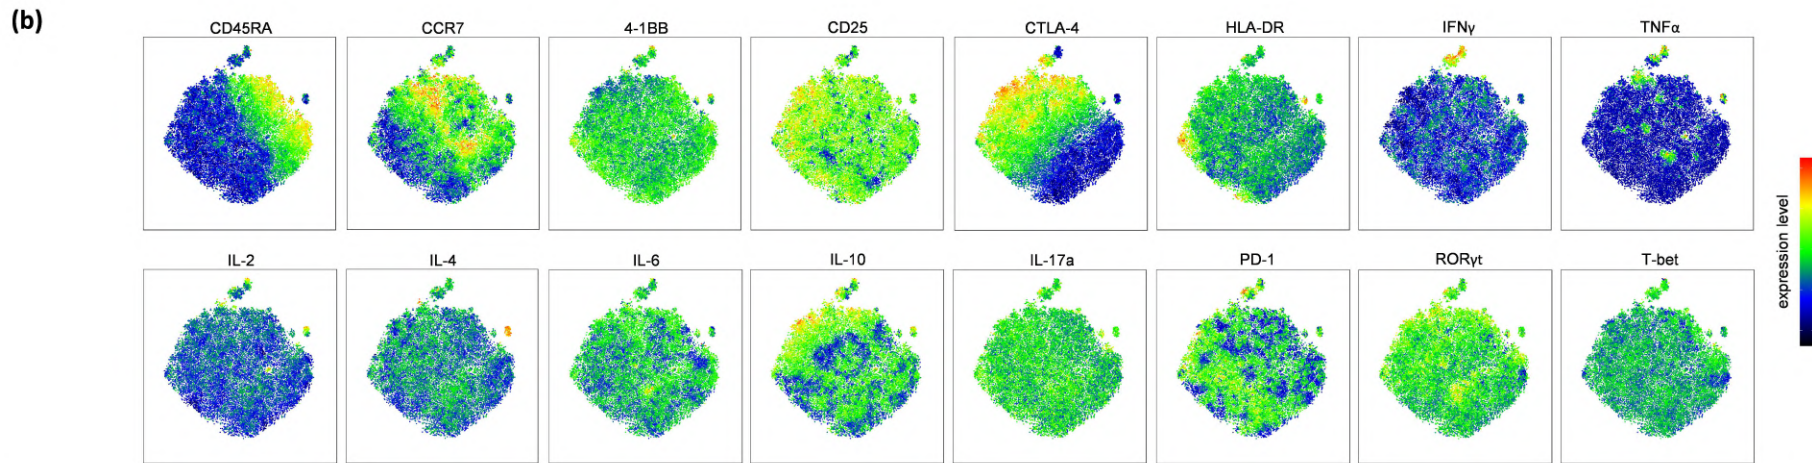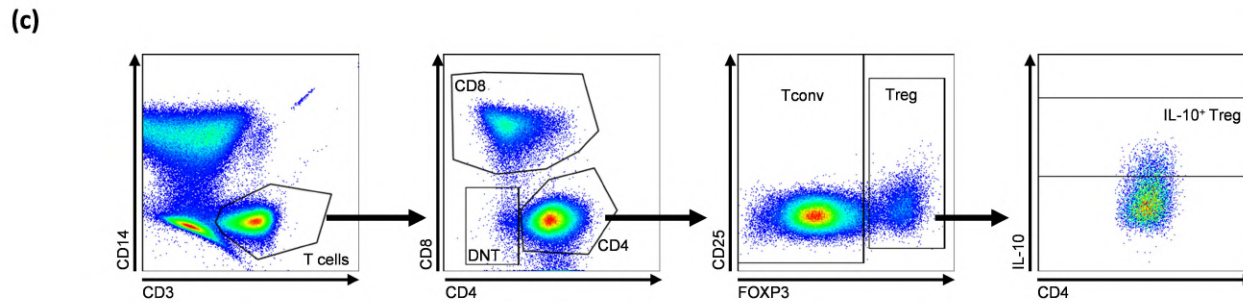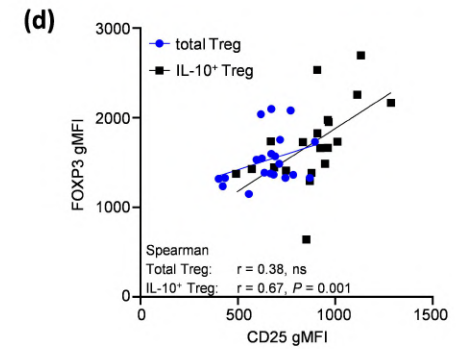

**Supplementary figure 4. Classification of CD8 T cells.** PBMCs were isolated from healthy controls (n=6), mild-moderate COVID-19 patients (n=23) and severe COVID-19 patients (n=20), stimulated and assessed through flow cytometry. CD3<sup>+</sup>CD14<sup>-</sup>CD4<sup>-</sup>CD8<sup>+</sup> conventional T cells were manually gated in FlowJo. **(a)** FlowSOM clusters (identified in Figure 4) were obtained based on CD45RA, CCR7, 4-1BB, CD25, CTLA-4, HLA-DR, IFN $\gamma$ , IL-2, IL-4, IL-6, IL-10, IL-17a, PD-1, ROR $\gamma$ t, T-BET, TNF $\alpha$ . Expression of each marker on each FlowSOM cluster is shown in histogram format and **(b)** imposed on a tSNE representation.

**Supplementary figure 4**

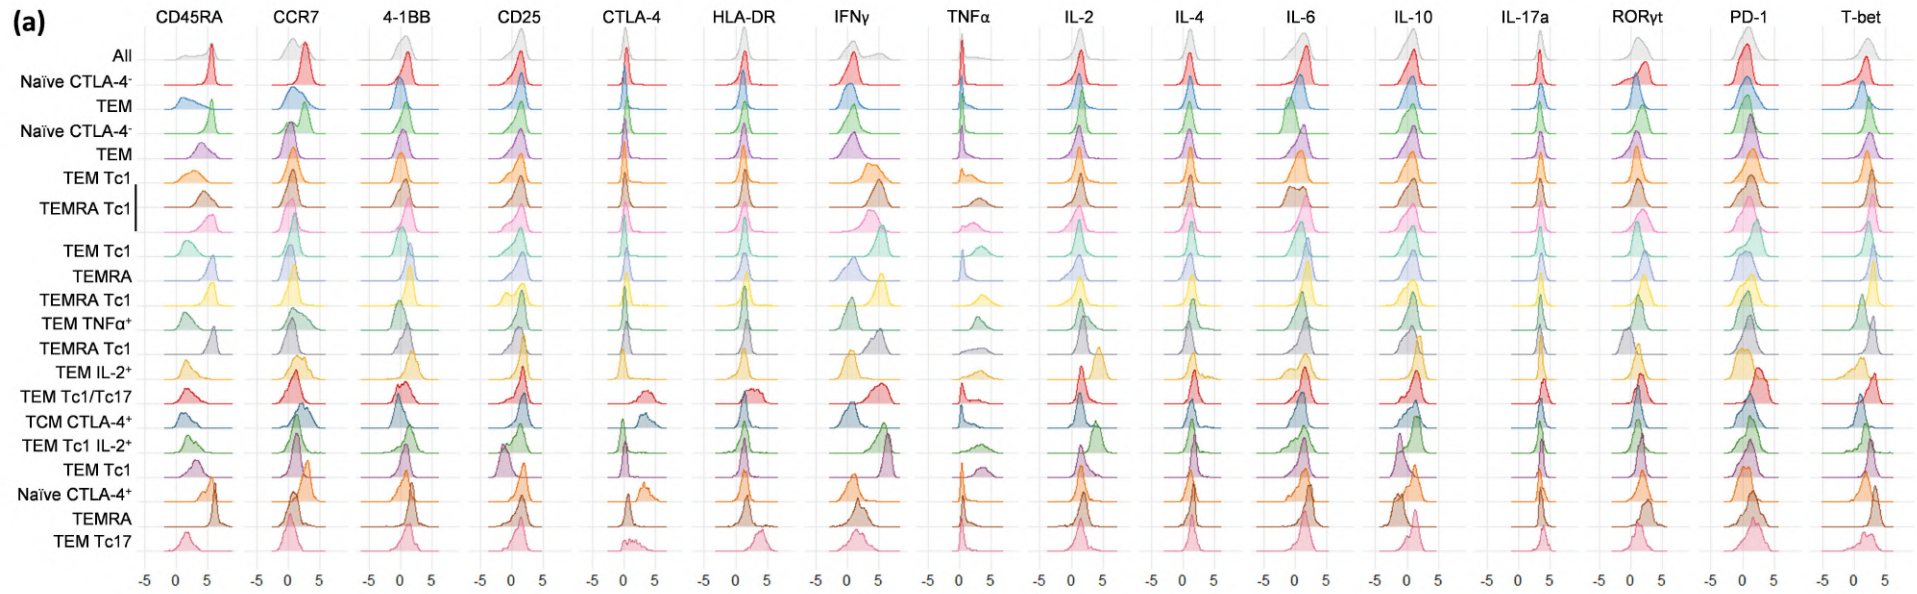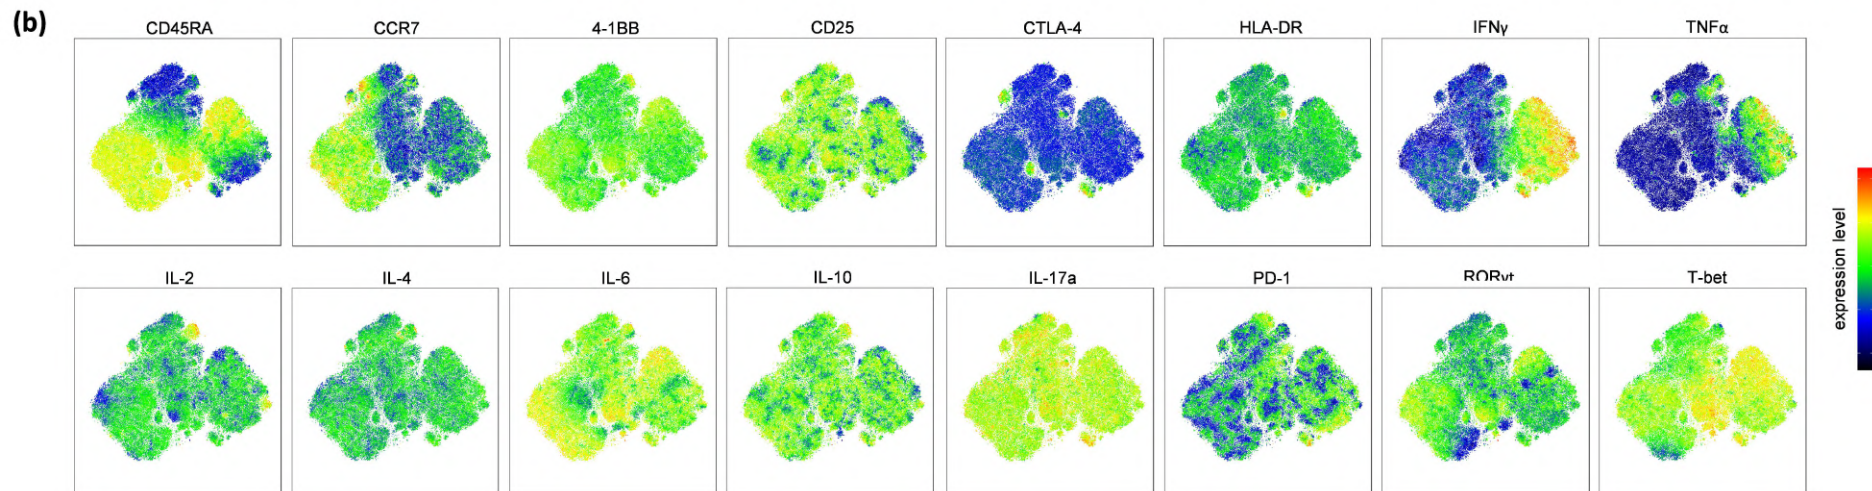

Supplement: CTI2-9-e1204-s001.pdf [file CTI2-9-e1204-s001.pdf]
